# Supplementary material
Source: PubMed Central journal article supplement (PMC3508312)

# S1: PTC Density and Recombination in *D. miranda*

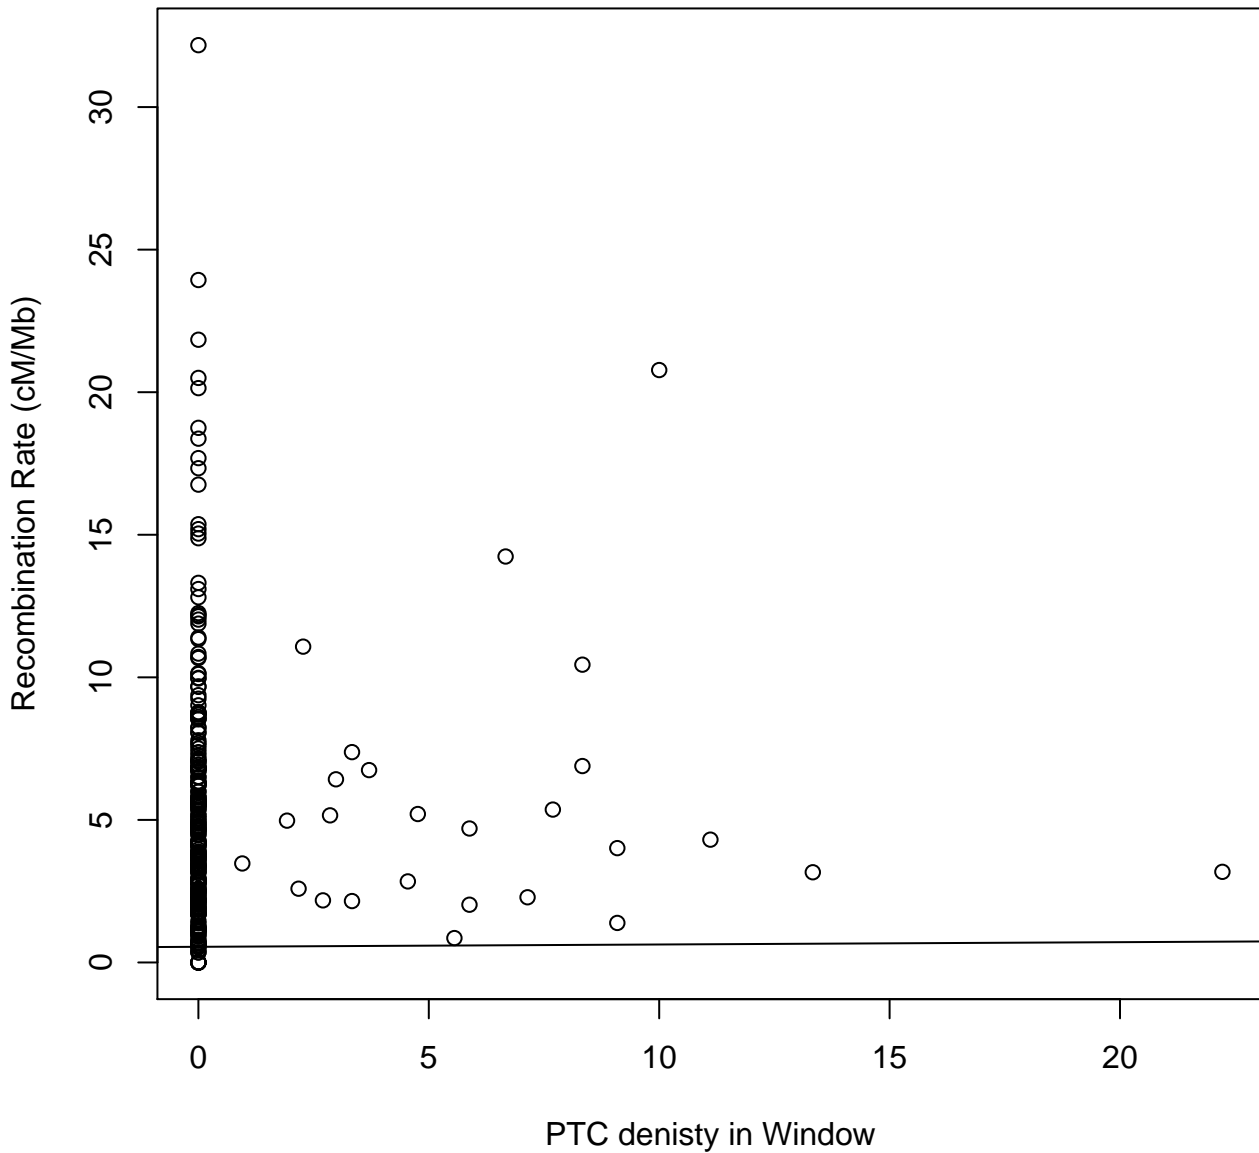

## S2: PTC Density and Recombination in *D. pseudoobscura* Flagstaff

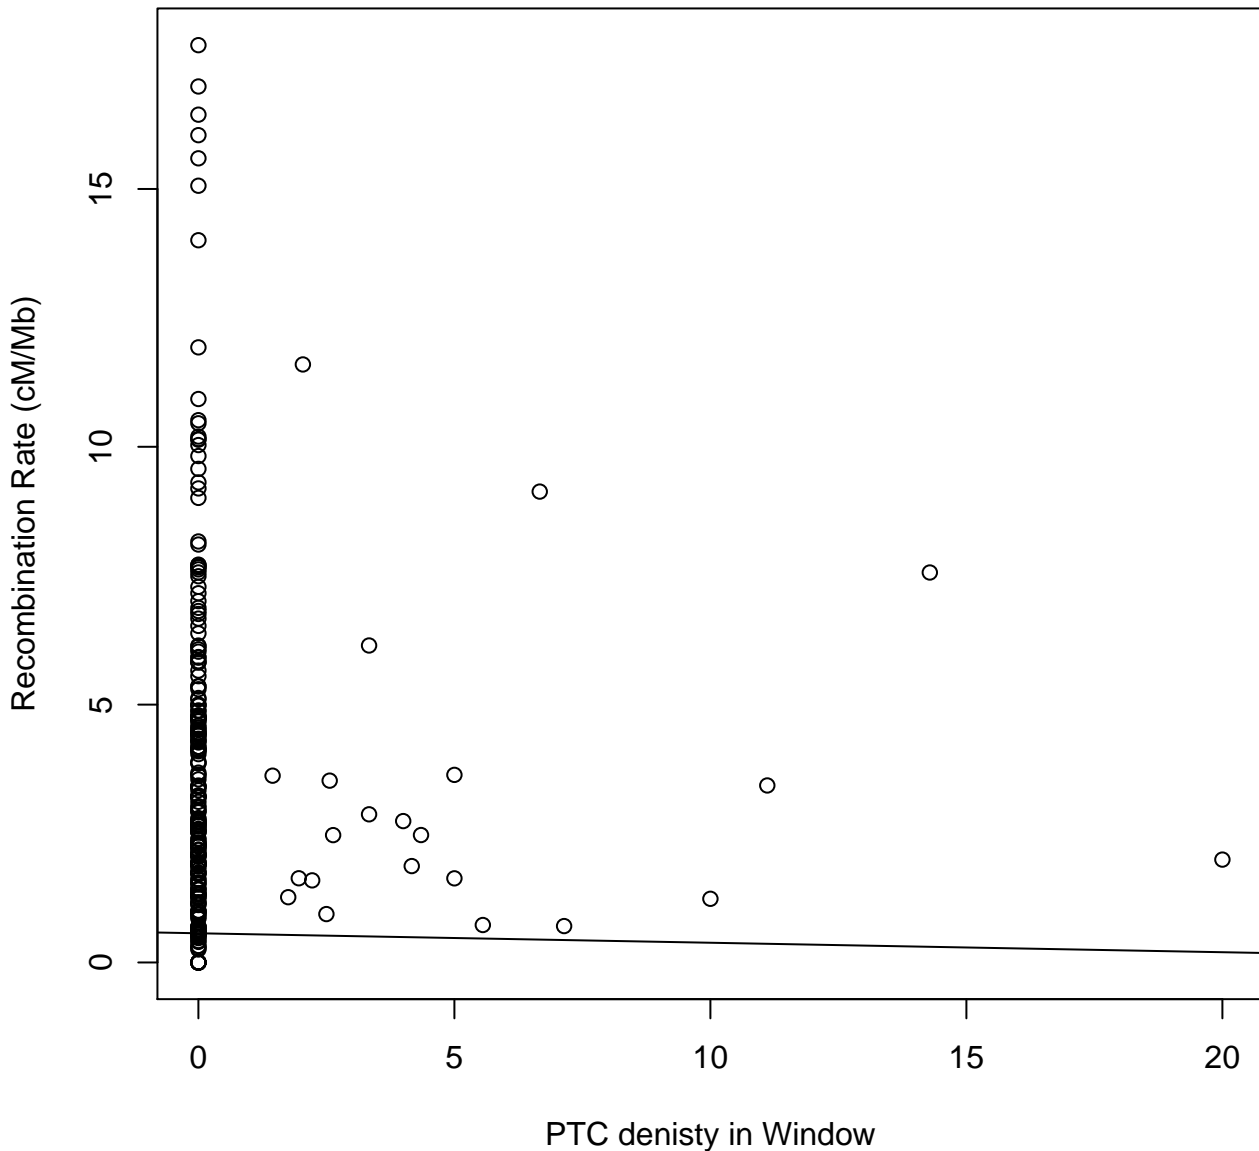

### S3: % truncation and Recombination in *D. miranda*

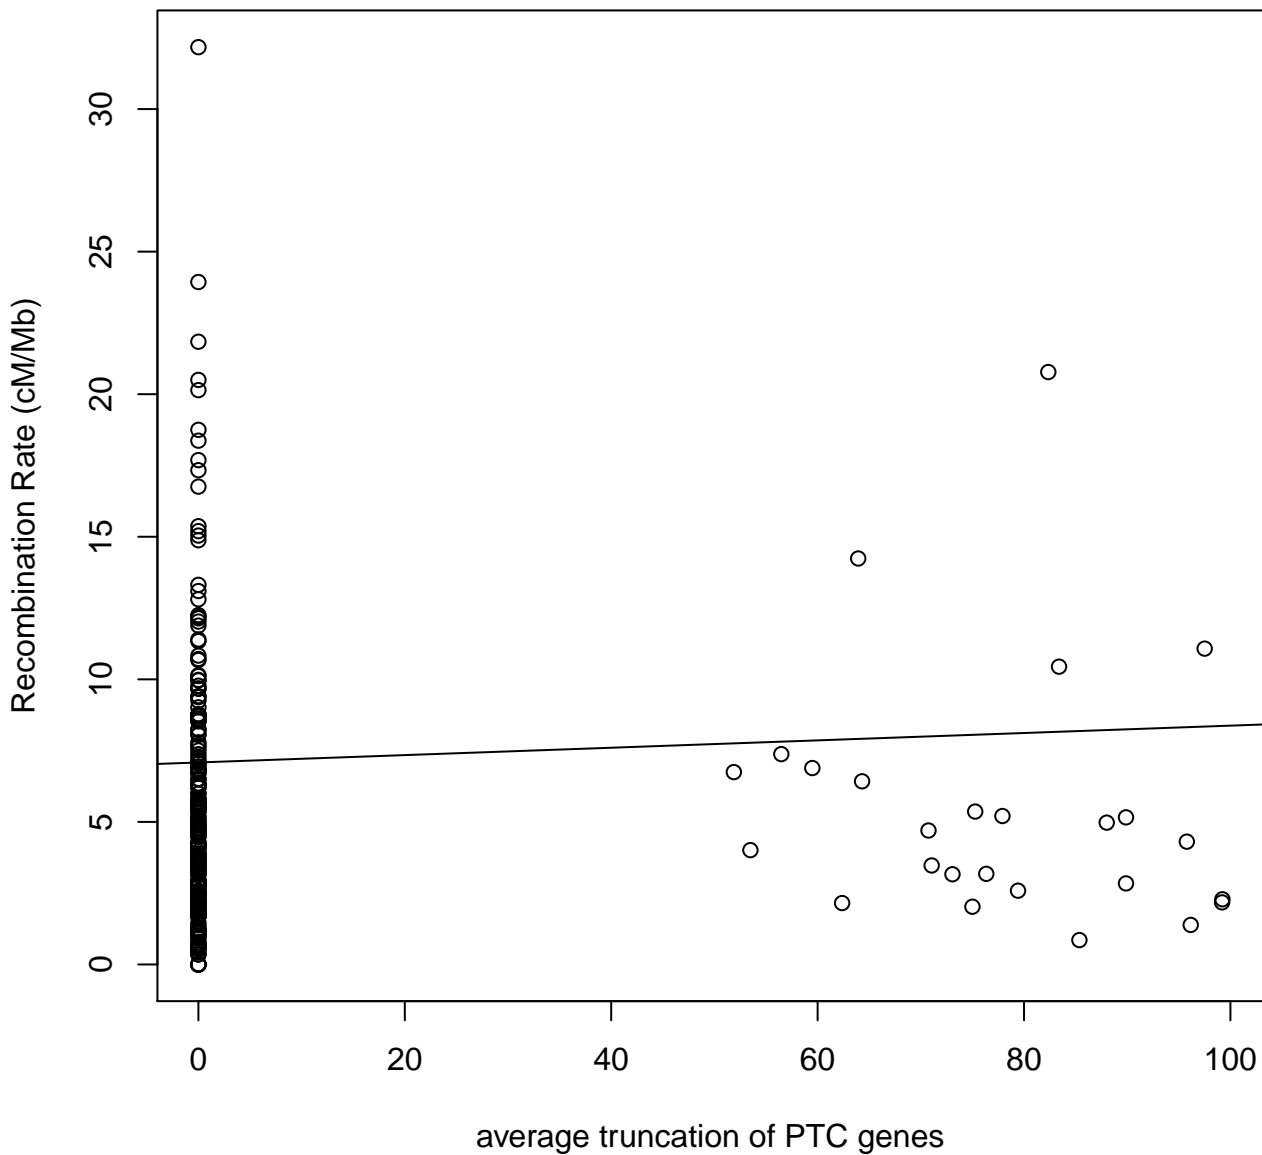

**S4: % truncation and Recombination in *D. pseudoobscura* Flagstaff**

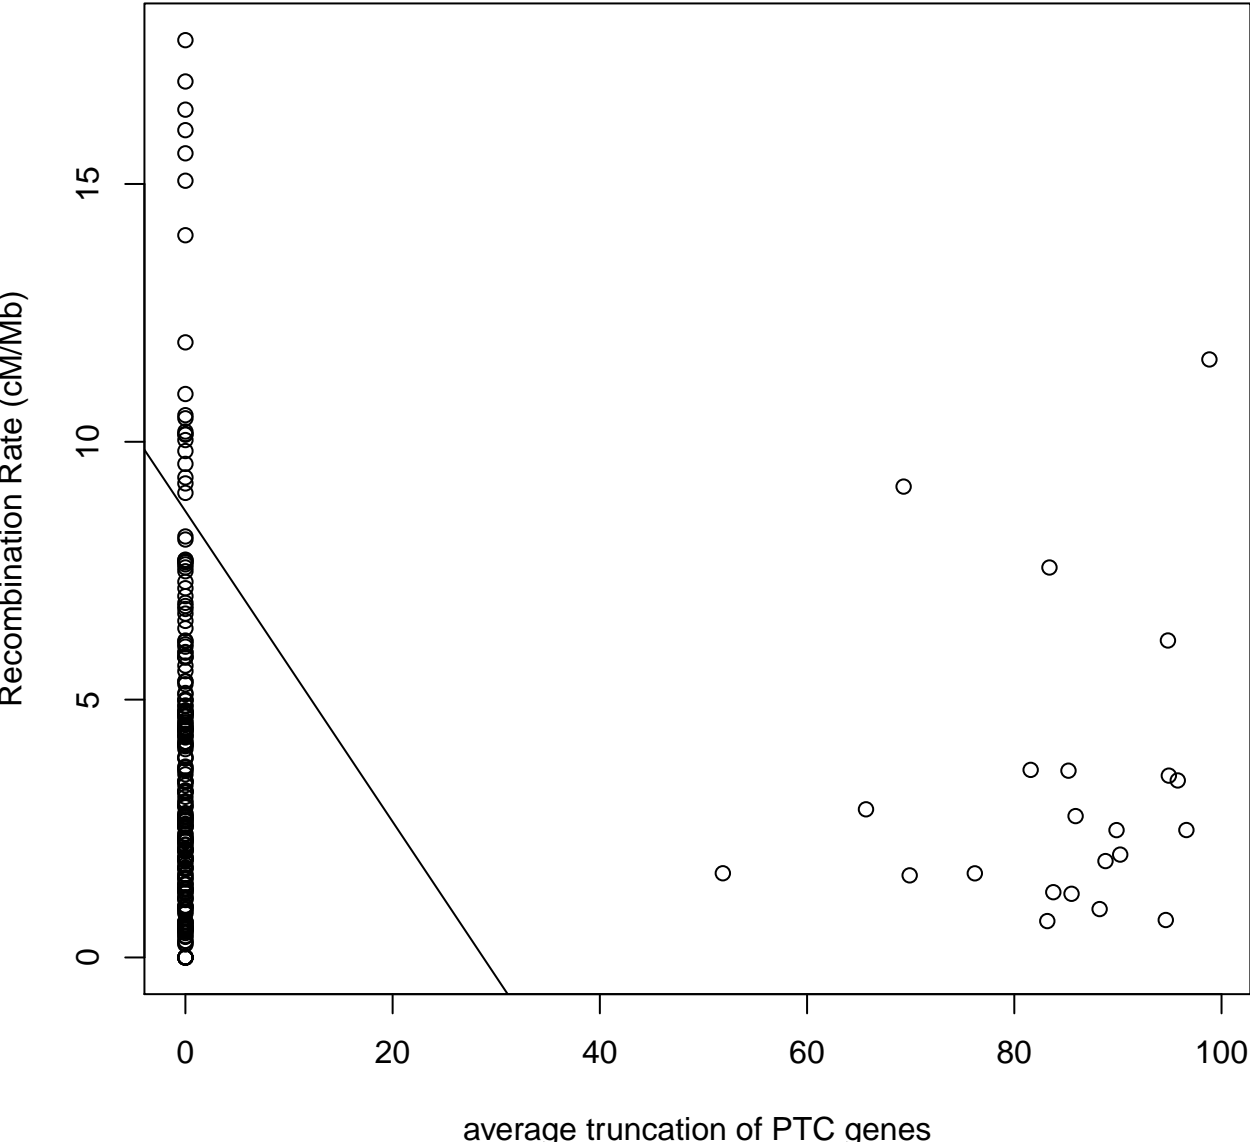

Supplement: NIHMS417193-supplement-Supp_Figs.pdf [file NIHMS417193-supplement-Supp_Figs.pdf]
